# Supplementary material for: Mesoions and ketene valence isomers. Three types of rearrangement of mesoionic pyridopyrimidinylium olates involving ketene intermediates †
Source: Royal Society of Chemistry journal article supplement (doi:10.1039/b003662p), 2000-01-01
Supplement: b003662p.doc [file b003662p.doc]

# Supplementary data

Mesoions and ketene valence isomers. Three types of rearrangement of mesoionic pyridopyrimidinylium olates involving ketene intermediates

**Anne Fiksdahl,[[1]](#footnote-2)† Carsten Plüg, and Curt Wentrup***

# *Chemistry Department, The University of Queensland, Brisbane, Qld 4072, Australia*

Four original argon matrix infrared spectra corresponding to Figure 1

Full scale spectrum corresponding to Fig 1a

Detail of Fig 1a showing 2-pyridyl isocyanate and ketene peaks

Full scale spectrum corresponding to Fig 1b

Full scale spectrum corresponding to Fig 1c

1. † On leave from NTNU, Norwegian University of Science and Technology, N-7491 Trondheim. Norway [↑](#footnote-ref-2)
